# Supplementary material for: Development of a solvent-free hydrogen storage and release system based on semi-solid-state ammonia borane (AB) fuel: high gravimetric capacity and feasibility for practical application
Source: Royal Society of Chemistry journal article supplement (doi:10.1039/c4ta04898a), 2014-01-01
Supplement: c4ta04898a1.pdf [file c4ta04898a1.pdf]

Supporting Information

**Development of Solvent-Free Hydrogen Storage and Release System based on Semi-Solid-State Ammonia Borane (AB) Fuel: High Gravimetric Capacity and Feasibility for Practical Application**

Sung-Kwan Kim, Sung-Ahn Hong, Ho-Jin Son,\* Won-Sik Han, Chang Won Yoon, Suk Woo Nam, and Sang Ook Kang\*

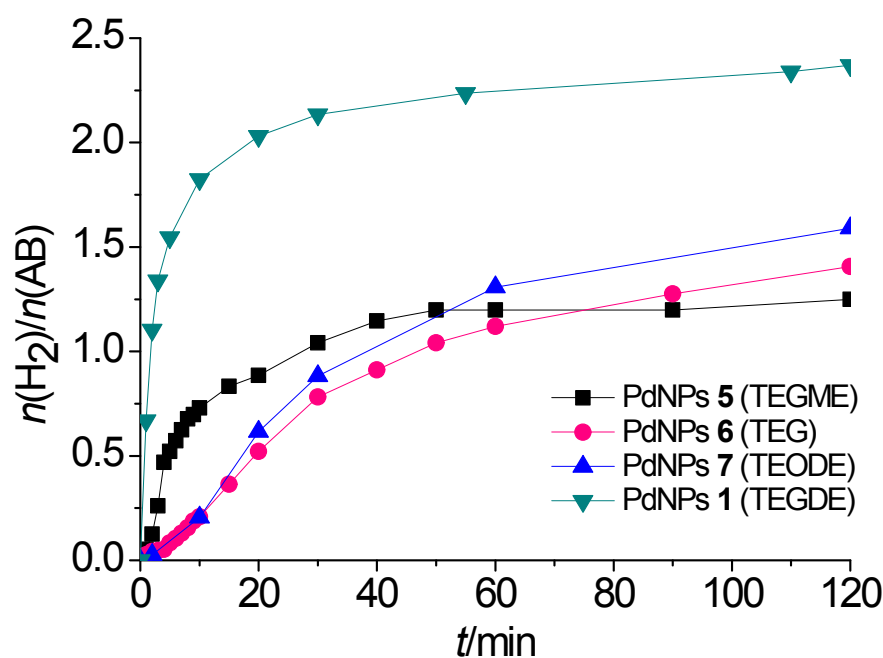

**Fig. S1** AB dehydrogenation kinetic profiles by PdNPs in **5** (TEGME), **6** (TEG), **7** (TEODE), and **1** (TEGDE).

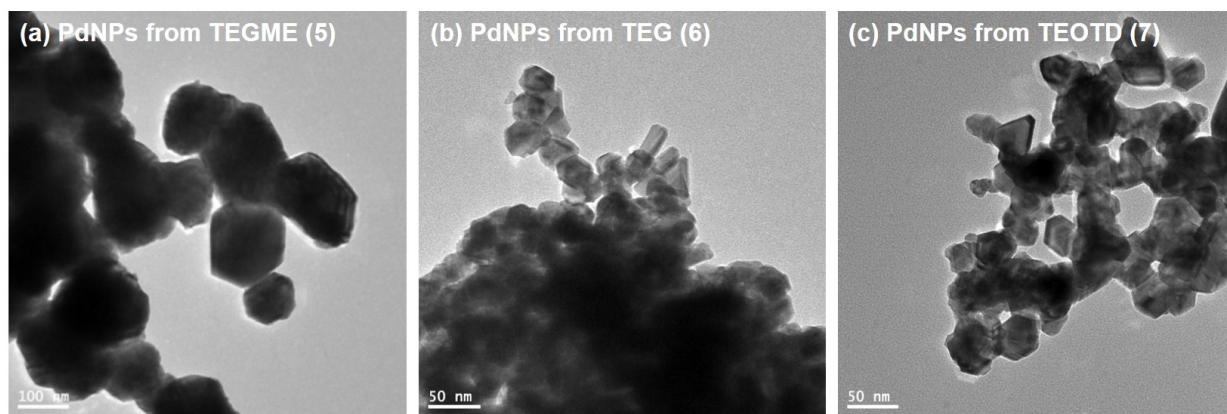

**Fig. S2** TEM images of PdNPs (**5–7** and **1**) prepared in TEGME, TEG, TEOTD, and TEGDE. [Scale bar: 100 nm (a), 50 nm (b) and (c)].

The PdNPs **5** prepared from TEGME are broadly classified into two types of species with different appearance among samples: the first family of nanoobjects observed was formed of nano-polyhedra; the second family of particles revealed a hexagonal aspect on TEM picture. All PdNPs **5** show a broad size distribution ranging from 50 to 100 nm. For the PdNPs **6** from TEG, the hexagonal nanoplates are observed as one of the main kinds of prepared NPs. Their average edge length is 15 nm. The rod-like particles are formed by the anisotropic growth of multiply-twinned particles. The directional growth is most likely due to a selective adsorption of the surfactant TEG stabilizing  $\{100\}$  facets and inhibiting their growth rate at the same time. These nano-rods present a length comprised between 30 and 40 nm while these particles have a diameter between 10 and 15 nm. Triangular type of particles with an average edge length of 40 nm is also partially observed on TEM image of PdNPs **6**. In the TEM image of PdNPs **7** prepared from TEOTD, mainly found is two types of triangular and hexagonal nanoplate with an average edge length of 40 and 20 nm, respectively (see Fig. S2c).

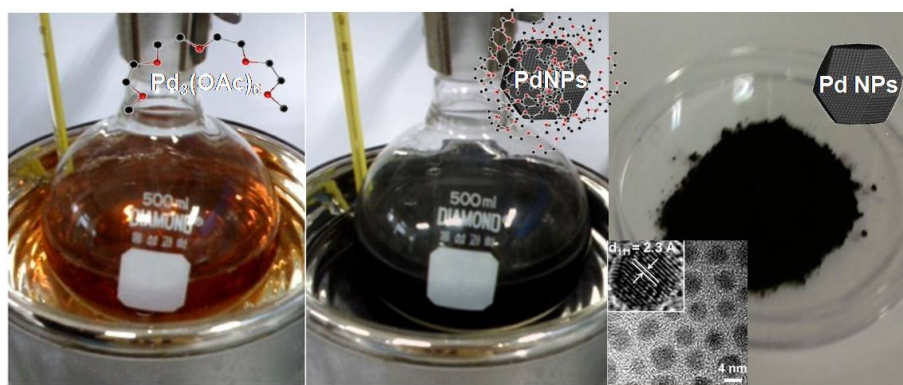

**Fig. S3** Large scale synthesis of PdNPs.
